# Supplementary material
Source: Springer Nature journal article supplement (https://www.springermedizin.de/resource/supplementary/13054_2013_2096_MOESM4_ESM.pdf/9711922)

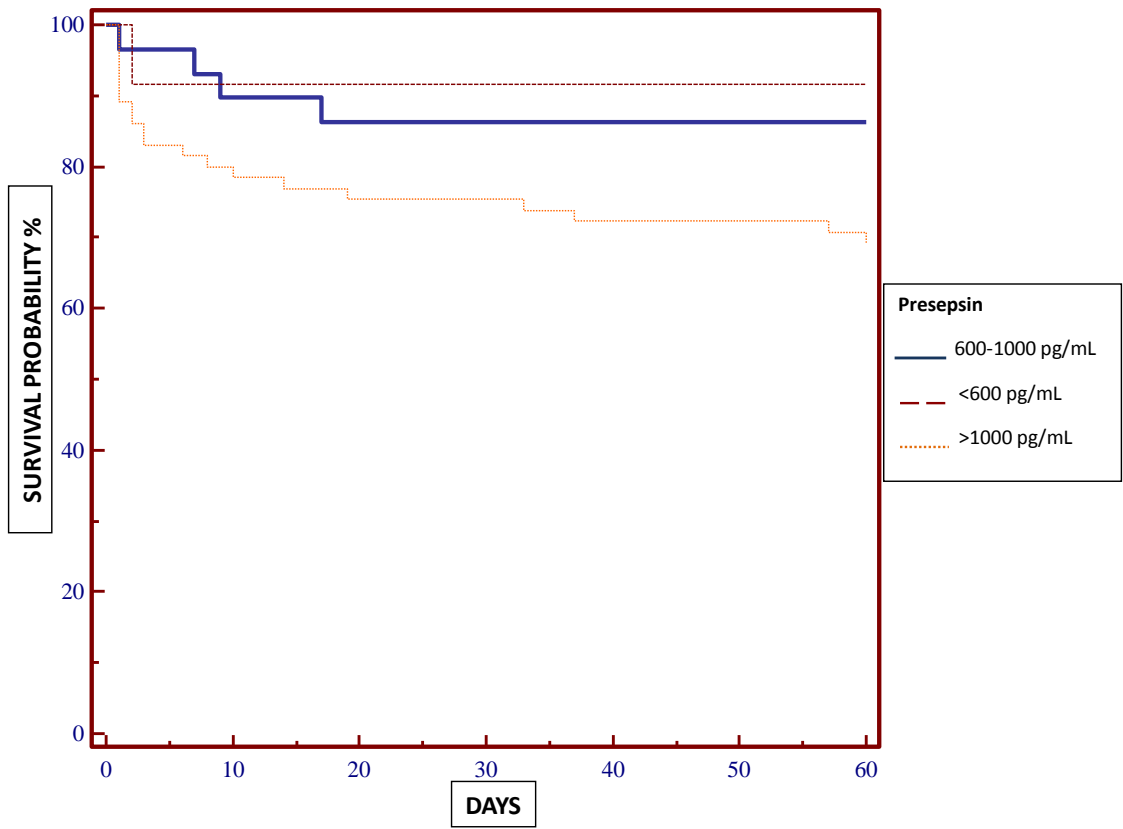

Supplement: MOESM4 [file 9711922]
